# Supplementary material for: Accessing low denticity coordination modes of a high denticity tripodal ligand to complete its coordinative repertoire
Source: Royal Society of Chemistry journal article supplement (doi:10.1039/c2dt31061a), 2012-01-01
Supplement: c2dt31061a.pdf [file c2dt31061a.pdf]

**Accessing low denticity coordination modes of a high denticity tripodal ligand to  
complete its coordinative repertoire**

Thomas Cadenbach, Eva Hevia, Alan R. Kennedy, Robert E. Mulvey,<sup>\*</sup> Janie-Anne  
Pickrell and Stuart D. Robertson<sup>\*</sup>

*WestCHEM, Department of Pure and Applied Chemistry, University of Strathclyde,  
Glasgow G1 1XL, Scotland, UK*

*\*E-mail: [r.e.mulvey@strath.ac.uk](mailto:r.e.mulvey@strath.ac.uk)*

**Supporting Information**

## Experimental Section

### General Remarks

All reactions and manipulations were carried out under a protective argon atmosphere using either standard Schlenk techniques or a glove box. All solvents were dried over Na/benzophenone and freshly distilled prior to use.  $t\text{Bu}_2\text{Zn}$ ,<sup>1</sup>  $t\text{Bu}_3\text{Ga}$ <sup>2</sup> and  $\text{Me}_6\text{TREN}$ <sup>3</sup> were all synthesised according to literature procedures.  $^1\text{H}$  and  $^{13}\text{C}$  NMR spectra were recorded on a Bruker AV400 MHz spectrometer (operating at 400.03 MHz for  $^1\text{H}$  and 100.58 MHz for  $^{13}\text{C}$ ). All  $^{13}\text{C}$  NMR spectra were proton decoupled. Elemental analyses (C, H, N) were performed by Denise Gilmour, University of Strathclyde Elemental Analysis Service.

### Synthesis of $\text{Zn}(t\text{Bu})_2N,N'$ - $\text{Me}_6\text{TREN}$ , **1**.

Freshly prepared  $(t\text{Bu})_2\text{Zn}$  (0.36 g, 2 mmol) was dissolved in hexane (3mL) and  $\text{Me}_6\text{TREN}$  (0.52 mmol, 2 mmol) was added via syringe. After stirring for ten minutes at room temperature this was cooled to  $-35^\circ\text{C}$  and deposited the final product as a crop of colourless crystals (0.491 g, 60 %). **Note:** care should be taken when handling  $(t\text{Bu})_2\text{Zn}$  and **1** as they are pyrophoric in air and smoke mildly even in an inert atmosphere.  $^1\text{H}$  NMR ( $\text{C}_6\text{D}_6$ , 300 K): 2.67 (t, 6 H, 7 Hz,  $\text{Me}_6\text{TREN CH}_2$ ), 2.37 (t, 6 H, 7 Hz,  $\text{Me}_6\text{TREN CH}_2$ ), 2.11 (s, 18 H,  $\text{Me}_6\text{TREN CH}_3$ ), 1.22 ppm (s, 18 H,  $\text{Zn}-t\text{Bu}$ ).  $^{13}\text{C}$  NMR ( $\text{C}_6\text{D}_6$ , 300 K): 58.0 ( $\text{Me}_6\text{TREN CH}_2$ ), 53.2 ( $\text{Me}_6\text{TREN CH}_2$ ), 46.2 ( $\text{Me}_6\text{TREN CH}_3$ ), 32.6 ( $\text{C}(\underline{\text{C}}\text{H}_3)_3$ ), 26.3 ( $\underline{\text{C}}(\text{CH}_3)_3$ ). Elemental analysis calcd (%) for  $\text{ZnN}_4\text{C}_{20}\text{H}_{48}$ : C 58.59, H 11.80, N 13.66; found: C 57.39, H 12.09, N 13.88. More accurate elemental analyses could not be obtained due to the highly air-sensitive nature of the product.

### Synthesis of [Ga(*t*Bu)<sub>3</sub>]<sub>3</sub>N-Me<sub>6</sub>TREN, **2**.

(*t*Bu)<sub>3</sub>Ga (0.30 mL, 1.5 mmol) was stirred in hexane (5 mL) and Me<sub>6</sub>TREN (0.13 mL, 0.5 mmol) was added via syringe. After stirring this solution for ten minutes at room temperature it was cooled to -35°C and deposited the final product as a crop of colourless crystals (0.241 g, 51 %). <sup>1</sup>H NMR (C<sub>6</sub>D<sub>6</sub>, 300 K): 2.53 (m, 12 H, Me<sub>6</sub>TREN CH<sub>2</sub> x 2), 2.16 (s, 18 H, Me<sub>6</sub>TREN CH<sub>3</sub>), 1.23 ppm (s, 81 H, Ga-*t*Bu). <sup>13</sup>C NMR (C<sub>6</sub>D<sub>6</sub>, 300 K): 58.1 (Me<sub>6</sub>TREN CH<sub>2</sub>), 52.1 (Me<sub>6</sub>TREN CH<sub>2</sub>), 45.8 (Me<sub>6</sub>TREN CH<sub>3</sub>), 31.5 (C(CH<sub>3</sub>)<sub>3</sub>), 30.1 (C(CH<sub>3</sub>)<sub>3</sub>). Elemental analysis calcd (%) for Ga<sub>3</sub>N<sub>4</sub>C<sub>48</sub>H<sub>111</sub>: C 60.46, H 11.73, N 5.88; found: C 59.24, H 10.80, N 6.20. More accurate elemental analyses could not be obtained due to the highly air-sensitive nature of the product.

### X-ray crystallography

Crystallographic data was collected at 123(2) K on Oxford Diffraction instruments with Mo K<sub>α</sub> radiation (λ = 0.71073 Å). Crystallographic measurements were made with an Oxford Diffraction Xcalibur E diffractometer at 123(2) K with MoK<sub>α</sub> monochromated radiation (λ = 0.71073 Å). The structures were solved and refined using SHELXS97<sup>4</sup> and SHELXL97<sup>4</sup>.

Crystal data for **1**, C<sub>20</sub>H<sub>48</sub>N<sub>4</sub>Zn, M<sub>r</sub> = 409.99, triclinic, space group P  $\bar{1}$ , *a* = 8.9150(3), *b* = 11.3744(5), *c* = 13.6985(6) Å, α = 66.433(4)°, β = 77.519(3)°, γ = 72.686(4)°, *V* = 1208.01(9) Å<sup>3</sup>, *Z* = 2, μ = 1.026 mm<sup>-1</sup>; 36079 reflections, 6738 unique, *R*<sub>int</sub> 0.0311, final refinement with full-matrix least squares on *F*<sup>2</sup> gave *R* = 0.0246 (*F*, 6194 obs. data only) and *R*<sub>w</sub> = 0.0610 (*F*<sup>2</sup>, all data), ) for 238 parameters, GOF = 1.060.

Crystal data for **2**, C<sub>48</sub>H<sub>111</sub> Ga<sub>3</sub>N<sub>4</sub>, M<sub>r</sub> = 953.57, hexagonal, space group P6<sub>3</sub>,  $a = b = 15.1685(3)$ ,  $c = 14.0228(3)$  Å,  $V = 2795.35(10)$  Å<sup>3</sup>,  $Z = 2$ ,  $\mu = 1.467$  mm<sup>-1</sup>; 8948 reflections, 4154 unique,  $R_{int}$  0.0254, final refinement with full-matrix least squares on  $F^2$  gave  $R = 0.0322$  ( $F$ , 3620 obs. data only) and  $R_w = 0.0715$  ( $F^2$ , all data), for 178 parameters, GOF = 1.056.

## References

1. P. C. Andrikopoulos, D. R. Armstrong, H. R. L. Barley, W. Clegg, S. H. Dale, E. Hevia, G. W. Honeyman, A. R. Kennedy and R. E. Mulvey, *J. Am. Chem. Soc.*, 2005, **127**, 6184-6185.
2. R. A. Kovar, H. Derr, D. Brandau and J. O. Callaway, *Inorg. Chem.*, 1975, **14**, 2809-2814.
3. G. J. P. Britovsek, J. England and A. J. P. White, *Inorg. Chem.*, 2005, **44**, 8125-8134.
4. G. M. Sheldrick, *Acta Crystallogr., Sect. A: Found. Crystallogr.*, 2008, **64**, 112-122.
